# Supplementary material
Source: Royal Society of Chemistry journal article supplement (doi:10.1039/d6gc00896h)
Supplement: d6gc00896h1.pdf [file d6gc00896h1.pdf]

## *Supporting Information*

### **Catalyst-Free Ammonia Decomposition in Atmospheric Pressure Nanosecond Pulsed DBD: Energy Deposition Dynamics and Its Role in Hydrogen Production**

Yixian Zeng <sup>a</sup>, Dingkun Yuan <sup>\*,a</sup>, Zhongqian Ling <sup>a</sup>, Biyi Huang <sup>b</sup>, Hao Zhang <sup>c</sup>, Lijian Wang <sup>\*,d</sup>, Zhihua Wang <sup>c</sup>

<sup>a</sup> *Zhejiang Provincial Key Laboratory for Research on Industrial Carbon Metrology Technology, China Jiliang University, Hangzhou 310018, China*

<sup>b</sup> *College of Electrical Engineering, Zhejiang University of Water Resources and Electric Power, Hangzhou, 310018, China*

<sup>c</sup> *State Key Laboratory of Clean Energy Utilization, Department of Energy Engineering, Zhejiang University, Hangzhou, 310027, China*

<sup>d</sup> *Zhejiang Key Laboratory of Digital Precision Measurement Technology Research, Zhejiang Institute of Quality Sciences, Hangzhou 310018, China*

**\*Corresponding authors:** Dingkun Yuan, Lijian Wang

**Email:** yaphets@cjlu.edu.cn (D. Yuan), 3100103014@zju.edu.cn (L. Wang)

This Supporting Information contains additional figure captions, table notes, and associated references

Figure captions

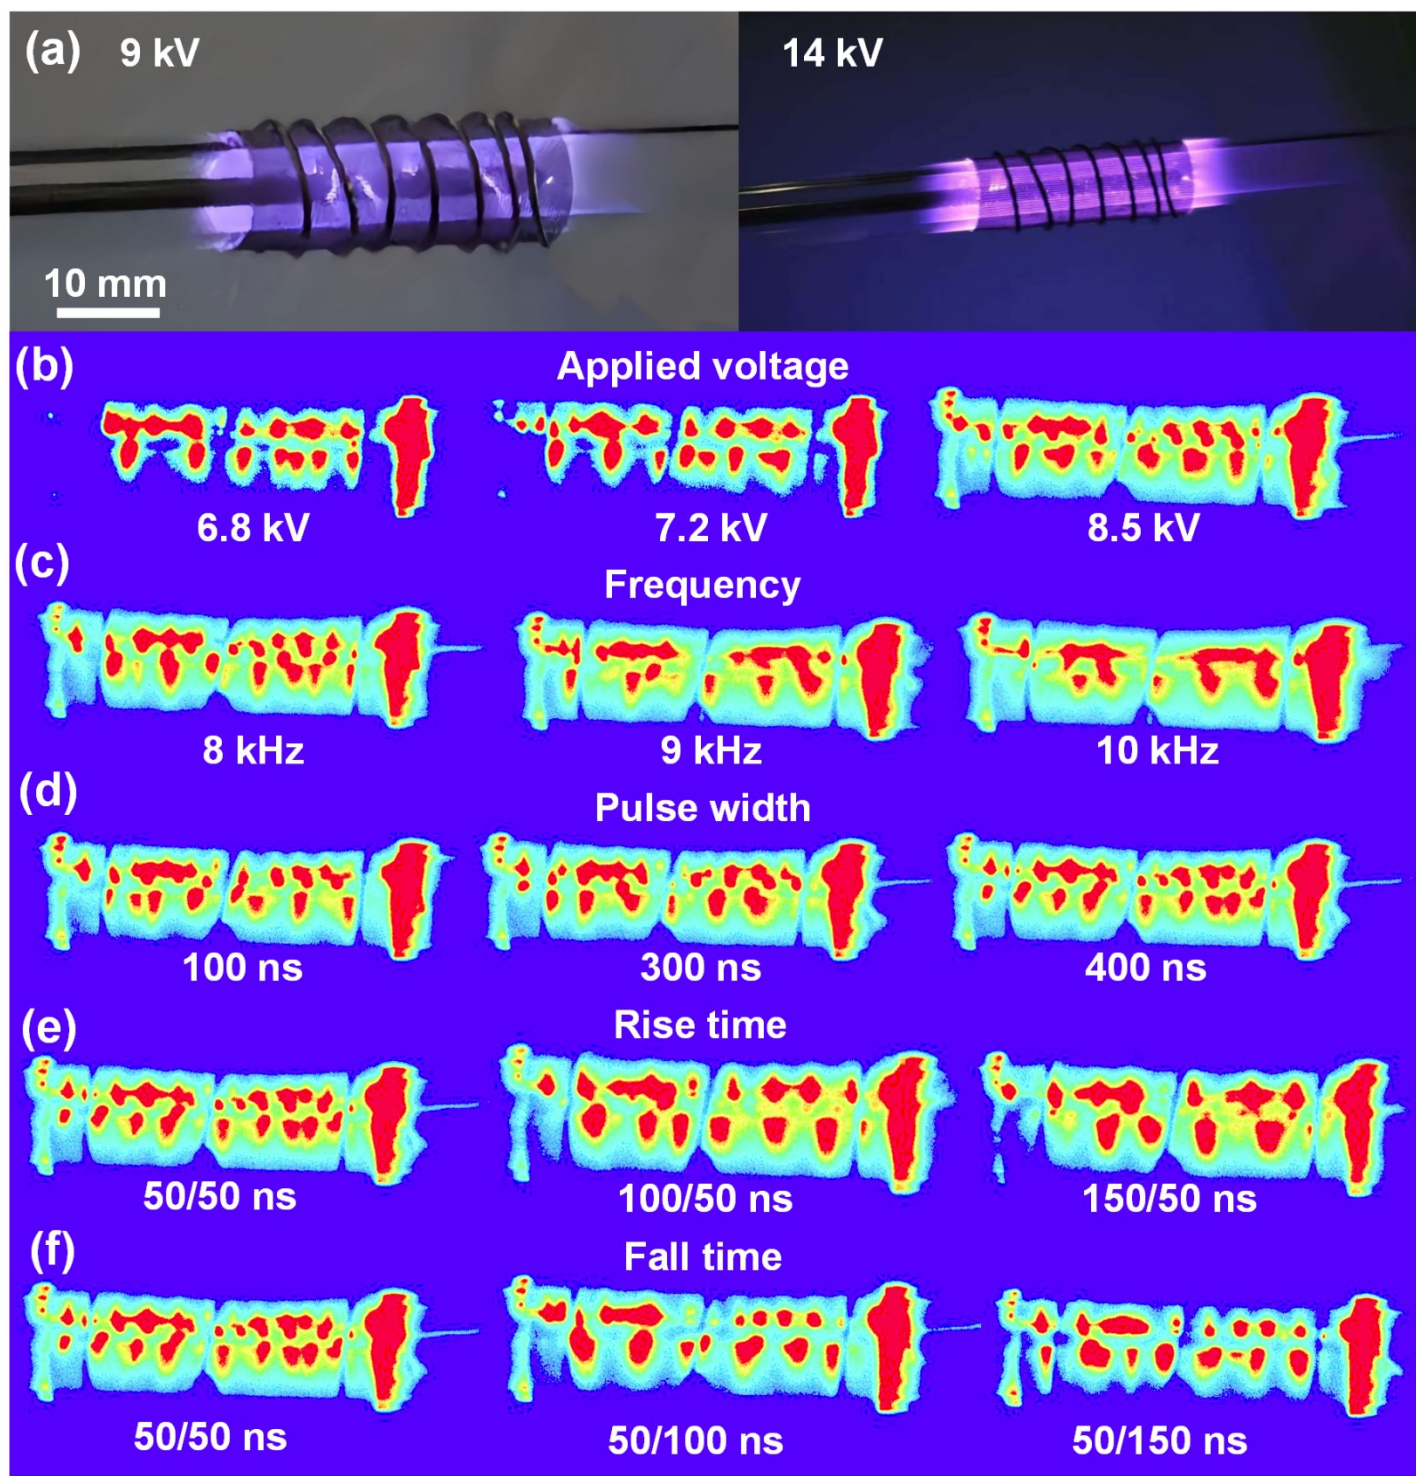

**Figure S1.** (a) Typical images at different voltages for AC-DBD ( $Q = 0.1$  SLM,  $f = 9$  kHz). These photographs were recorded using a digital camera with an exposure time of 50 ms, an aperture of  $f/3.2$ , and an ISO setting of 3200. (b) ICCD images at different voltages ( $Q = 0.1$  SLM,  $f = 7$  kHz,  $T_{pw} = 200$  ns,  $T_{ris}/T_{fal} = 50/50$  ns), (c) frequencies ( $Q = 0.1$  SLM,  $V_{pp} = 11$  kV,  $T_{pw} = 200$  ns,  $T_{ris}/T_{fal} = 50/50$  ns,  $SIE = 9.5$  kJ·L<sup>-1</sup>), (d) pulse widths ( $Q = 0.1$  SLM,  $f = 7$  kHz,  $V_{pp} = 11$  kV,  $T_{ris}/T_{fal} = 50/50$  ns,  $SIE = 9.5$  kJ·L<sup>-1</sup>), (e) rise times ( $Q = 0.1$  SLM,  $f = 7$  kHz,  $V_{pp} = 11$  kV,  $T_{pw} = 400$  ns,  $SIE = 9.5$  kJ·L<sup>-1</sup>), (f) fall times ( $Q = 0.1$  SLM,  $f = 7$  kHz,  $V_{pp} = 11$  kV,  $T_{pw} = 400$  ns,  $SIE = 9.5$  kJ·L<sup>-1</sup>) for NP-DBD. All ICCD images were acquired with a gate delay of 100 ns and a gate width of 20 ns. The remaining ICCD settings were kept unchanged for comparison.

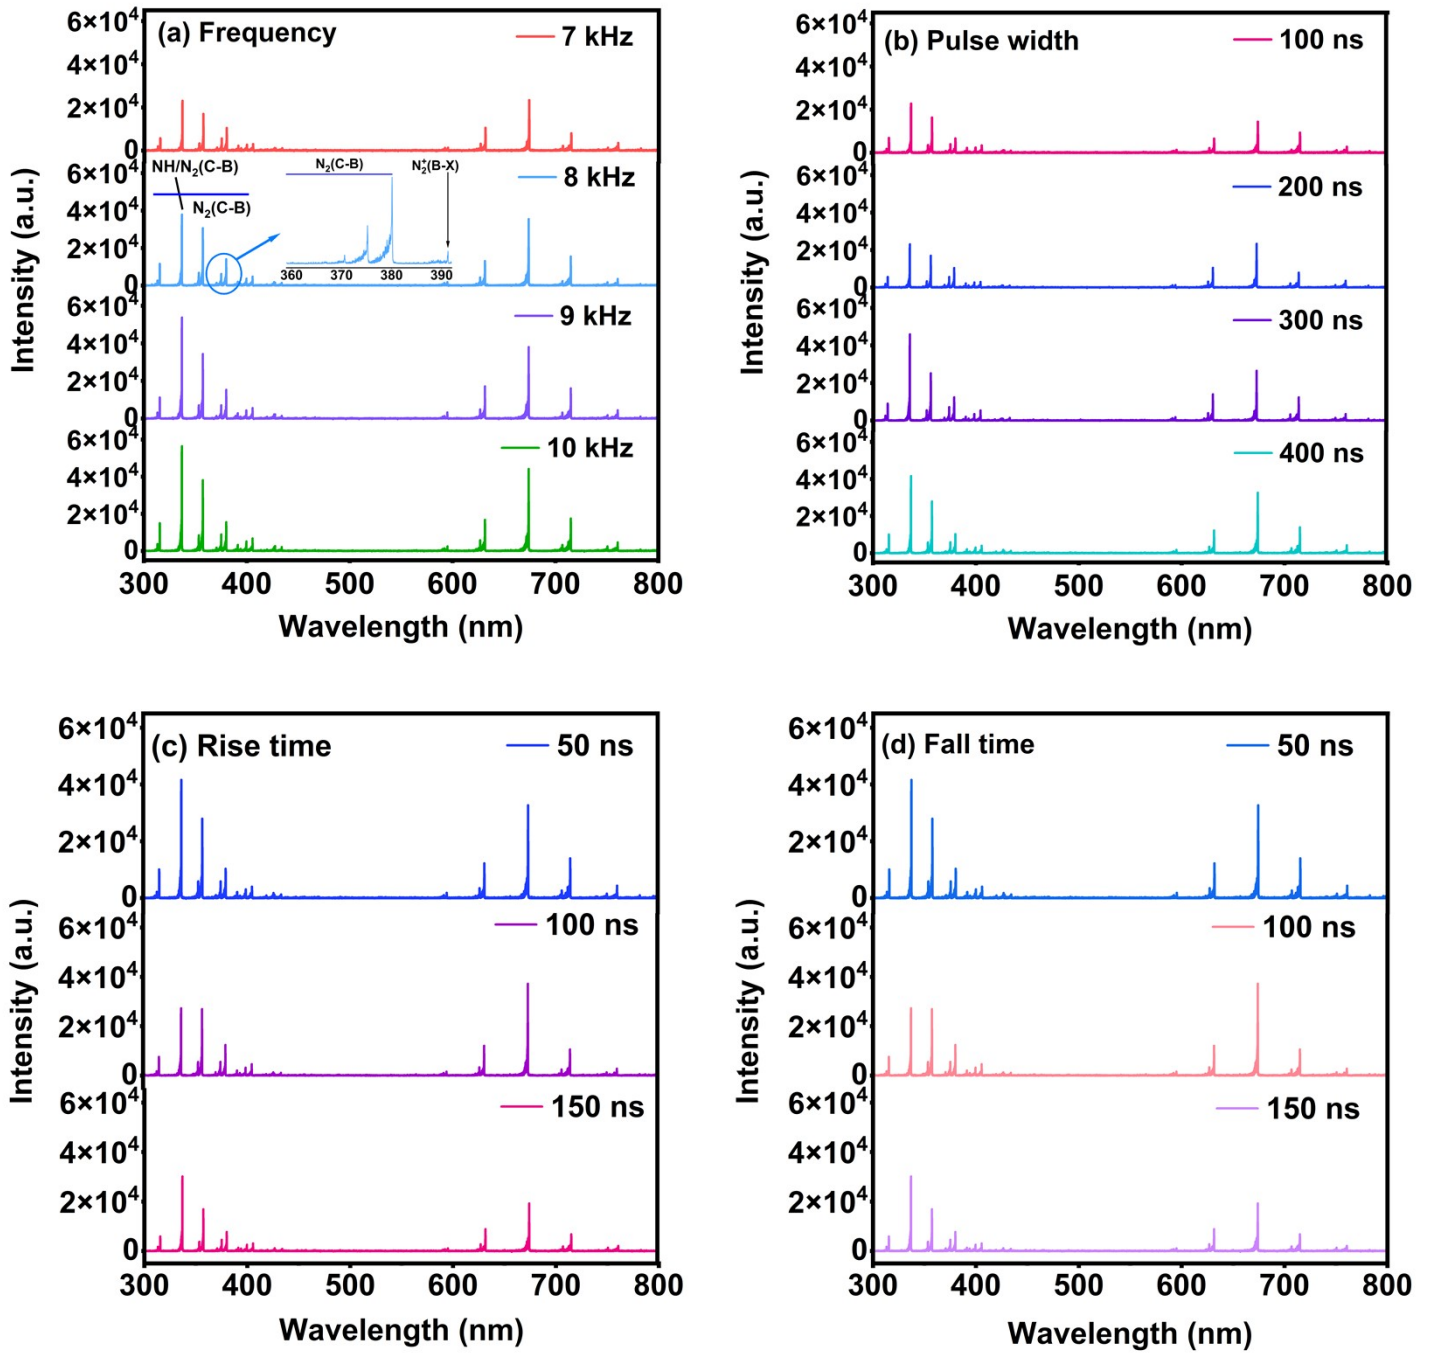

**Figure S2.** OES of NP-DBD at different (a) frequencies, (b) pulse widths, (c) rise times and (d) fall times ( $Q = 0.1$  SLM,  $V_{pp} = 8$  kV).

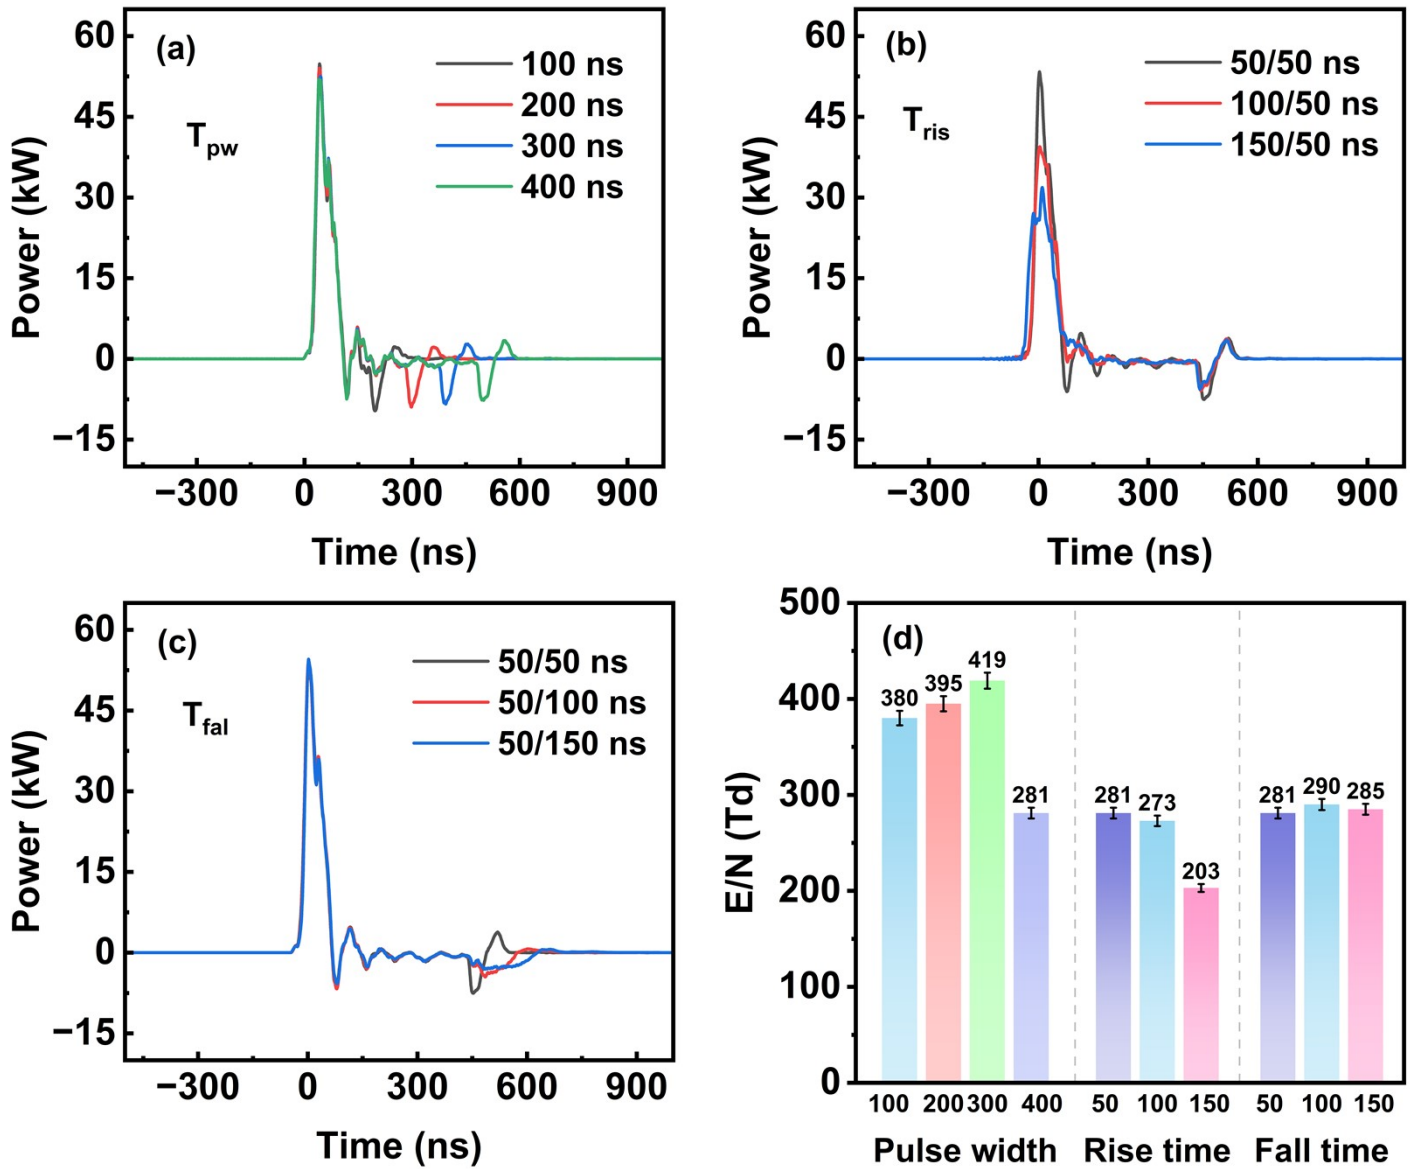

**Figure S3.** Instantaneous power profiles and corresponding estimated reduced electric fields under representative operating conditions at the same  $V_{pp}$  ( $f = 7\text{kHz}$ ,  $V_{pp} = 8.5\text{ kV}$ ). (a) Temporal power profiles  $P(t)$  under different  $T_{pw}$ . (b) Temporal power profiles under different  $T_{ris}$ . (c) Temporal power profiles under different  $T_{fal}$ . (d) Estimated  $E/N$  under the corresponding conditions.

## Table Notes

Table S1 summarizes representative previous studies on non-catalytic NH<sub>3</sub> decomposition in DBD reactors for contextual comparison with the present work. Because substantial differences exist among studies in reactor configuration, feed composition, operating conditions, and performance metric definitions, this comparison is intended mainly as a reference for positioning rather than as a strict direct ranking.

In addition to NH<sub>3</sub> conversion, H<sub>2</sub> production rate ( $R_{H_2}$ , g·h<sup>-1</sup>), energy yield ( $E_{H_2}$ , g H<sub>2</sub>·kWh<sup>-1</sup>), and EUE are listed when available. For studies in which H<sub>2</sub> production rate and energy yield were not explicitly reported, they were estimated from the reported feed flow rate, NH<sub>3</sub> concentration, conversion, and input power according to Eqs. (S1) and (S2)<sup>1</sup>:

$$R_{H_2} (g \cdot h^{-1}) = Q_{H_2} (L \cdot \min^{-1}) \times \rho_{H_2} (g \cdot L^{-1}) \times 60 (\min \cdot h^{-1}) = \frac{Q_{H_2} (L \cdot \min^{-1}) \times 2 (g \cdot \text{mol}^{-1}) \times 60 (\min \cdot h^{-1})}{22.4 (L \cdot \text{mol}^{-1})} \quad \backslash *$$

MERGEFORMAT (S1)

where  $Q_{H_2}$  is the volumetric flow rate of H<sub>2</sub>, calculated from Eq. (7).

$$E_{H_2} (gH_2 \cdot kWh^{-1}) = \frac{R_{H_2} (g \cdot h^{-1})}{P_{in} (kW)} \quad \backslash * \text{ MERGEFORMAT (S2)}$$

In this work, the H<sub>2</sub>-related energy term used in the EUE calculation is based on the stoichiometric H<sub>2</sub> amount corresponding to converted NH<sub>3</sub> rather than on directly measured hydrogen energy output. Therefore, the EUE reported here is used as a conversion-based comparative metric for energy utilization under different operating conditions. For the present work, the reported single values of H<sub>2</sub> production rate, energy yield, and EUE correspond to the operating condition with the maximum EUE.

Table S1 Comparison of non-catalytic NH<sub>3</sub> decomposition from various studies in DBD.

| Author/Year<br>(Ref.)      | Power<br>supply | Rotational<br>temperature<br>(K) | Macroscopic<br>reaction<br>temperature (K)       | SIE<br>(kJ·L <sup>-1</sup> ) | Feed flow<br>rate<br>(L·min <sup>-1</sup> ) | Feed NH <sub>3</sub><br>concentration<br>(%) | NH <sub>3</sub><br>conversion<br>(%) | H <sub>2</sub><br>production<br>rates (g·h <sup>-1</sup> ) | Energy yield<br>(g H <sub>2</sub> ·kWh <sup>-1</sup> ) | EUE (%) |
|----------------------------|-----------------|----------------------------------|--------------------------------------------------|------------------------------|---------------------------------------------|----------------------------------------------|--------------------------------------|------------------------------------------------------------|--------------------------------------------------------|---------|
| Zhao/2013 <sup>2</sup>     | AC              | -                                | -                                                | 25.3-36.4                    | 0.04                                        | 100                                          | 32-98                                | 0.315                                                      | 12.981                                                 | 31.87   |
| Goto/2017 <sup>3</sup>     | AC              | -                                | -                                                | 18                           | 1                                           | 100                                          | 19                                   | 1.527                                                      | 5.089                                                  | 14.89   |
| Akiyama/2018 <sup>4</sup>  | AC              | -                                | 298-523<br>(Electrode<br>surface<br>temperature) | 0.6-15                       | 0.2                                         | 4.9                                          | 2-100                                | 0.079                                                      | 1.575                                                  | 5.1     |
| Yi/2018 <sup>5</sup>       | AC              | -                                | 643-773 (Packed<br>bed temperature)              | 15.1-24.1                    | 0.12                                        | 100                                          | 8-23                                 | 0.222                                                      | 4.601                                                  | 9.1     |
| Bang/2023 <sup>6</sup>     | AC              | -                                | 300-900<br>(Reaction gas<br>temperature)         | 0.3-1.2                      | 1                                           | 1                                            | 8-16                                 | 0.013                                                      | 0.643                                                  | 3.9     |
| Andersen/2023 <sup>7</sup> | AC              | -                                | -                                                | 6-18                         | 0.05                                        | 2                                            | 34-82                                | 0.007                                                      | 0.439                                                  | 1.4     |
| Wang/2024 <sup>8</sup>     | AC              | -                                | 633-743 (Packed<br>bed temperature)              | 32.4-42                      | 0.04                                        | 100                                          | 17-23                                | 0.074                                                      | 2.640                                                  | 5.5     |
| Gao/2024 <sup>9</sup>      | NP              | -                                | 298-898<br>(Reaction gas<br>temperature)         | -                            | 0.1                                         | 5                                            | 26.3-100                             | -                                                          | -                                                      | -       |
| This work                  | AC              | 379-633                          | 297-479<br>(Reaction gas<br>temperature)         | 3.7-<br>11.2                 | 0.1                                         | 5                                            | 13.0-71.1                            | 0.029                                                      | 1.530                                                  | 4.41    |
|                            | NP              | 388-597                          | 297-395<br>(Reaction gas<br>temperature)         | 5.4-9.5                      | 0.1                                         | 5                                            | 34.4-99.5                            | 0.040                                                      | 2.525                                                  | 7.19    |

Note. For the present work, the reported single values of H<sub>2</sub> production rate, energy yield, and EUE correspond to the operating condition with the maximum EUE.

## References

1. X. Zhang and M. S. Cha, *Journal of Physics D: Applied Physics*, 2024, **57**, 065203.
2. Y. Zhao, L. Wang, J. Zhang, W. Gong and H. Guo, *Catalysis Today*, 2013, **211**, 72–77.
3. Y. Goto, Y. Hayakawa and S. Kambara, 2017.
4. M. Akiyama, K. Aihara, T. Sawaguchi, M. Matsukata and M. Iwamoto, *International Journal of Hydrogen Energy*, 2018, **43**, 14493–14497.
5. Y. Yi, L. Wang, Y. Guo, S. Sun and H. Guo, *AIChE Journal*, 2019, **65**, 691–701.
6. S. Bang, R. Snoeckx and M. S. Cha, *The Journal of Physical Chemistry A*, 2023, **127**, 1271–1282.
7. J. Andersen, K. van't Veer, J. Christensen, M. Østberg, A. Bogaerts and A. Jensen, *Chemical Engineering Science*, 2023, **271**, 118550.
8. Z. Wang, H. Zhang, Z. Ye, G. He, C. Liao, J. Deng, G. Lei, G. Zheng, K. Zhang and F. Gou, *International Journal of Hydrogen Energy*, 2024, **49**, 1375–1385.
9. Y. Gao, M. Zhou, E. Hu, Y. Zhao, G. Yin and Z. Huang, *Energy Conversion and Management*, 2024, **306**, 118271.
